# Supplementary material for: Changes in the gene expression profile during spontaneous migraine attacks
Source: PubMed Central journal article supplement (PMC8050061; doi:10.1038/s41598-021-87503-5), 2021-04-15
Supplement: 41598_2021_87503_MOESM1_ESM.pdf [file 41598_2021_87503_MOESM1_ESM.pdf]

# Changes in the gene expression profile during spontaneous migraine attacks

## Running head: RNA-sequencing of spontaneous migraine attacks

Lisette J.A. Kogelman<sup>1\*δ</sup>, Katrine Falkenberg<sup>1\*</sup>, Alfonso Buil<sup>2</sup>, Pau Erola<sup>3</sup>, Julie Courraud<sup>4</sup>, Susan Svane Laursen<sup>4</sup>, Tom Michoel<sup>5</sup>, Jes Olesen<sup>1</sup>, Thomas F. Hansen<sup>1,2,6 δ</sup>.

\*Contributed equally

<sup>1</sup> Danish Headache Center, Department of Neurology, Rigshospitalet Glostrup, Glostrup, Denmark.

<sup>2</sup> Institute for Biological Psychiatry, Mental Health Center Sct. Hans, Denmark

<sup>3</sup> MRC Integrative Epidemiology Unit, University of Bristol, UK

<sup>4</sup> Department of Clinical Biochemistry and Immunology, Statens Serum Institute Copenhagen, Copenhagen, Denmark

<sup>5</sup> Computational Biology Unit, Department of Informatics, University of Bergen, Norway

<sup>6</sup> Novo Nordic Foundation Centre for protein research, Copenhagen University, Copenhagen, Denmark

<sup>δ</sup> Corresponding authors: Senior Bioinformatician, Lisette J.A. Kogelman, [Lisette.kogelman@regionh.dk](mailto:Lisette.kogelman@regionh.dk) and Assoc. Prof. Thomas Folkmann Hansen, [thomas.hansen@regionh.dk](mailto:thomas.hansen@regionh.dk)

Rigshospitalet - Neurocentret - Glostrup, Nordstjernevej 42, 2600 Glostrup, Denmark

## **Supplementary Materials**

**Table S1.** Expression of migraine GWAS genes during and outside migraine attack.

**Table S2.** Enriched migraine-specific GO-terms.

**Table S1.** Expression of migraine GWAS genes during and outside migraine attack.

|                 | <i>Migraine<br/>attack (A)</i> | <i>After<br/>treatment (B)</i> | <i>Outside<br/>attack (C)</i> | <i>After cold<br/>pressor test (D)</i> |
|-----------------|--------------------------------|--------------------------------|-------------------------------|----------------------------------------|
| <i>ADAMTSL4</i> | 13385                          | 13586                          | 13196                         | 14529                                  |
| <i>ASTN2</i>    | 294                            | 292                            | 290                           | 349                                    |
| <i>CARF</i>     | 713                            | 676                            | 713                           | 916                                    |
| <i>CCM2L</i>    | 18                             | 18                             | 17                            | 21                                     |
| <i>CFDP1</i>    | 1476                           | 1296                           | 1332                          | 1528                                   |
| <i>DOCK4</i>    | 953                            | 947                            | 956                           | 1107                                   |
| <i>ECM1</i>     | 110                            | 103                            | 103                           | 103                                    |
| <i>HCK</i>      | 64250                          | 59483                          | 62189                         | 62629                                  |
| <i>HEY2</i>     | 18                             | 15                             | 19                            | 16                                     |
| <i>HJURP</i>    | 141                            | 136                            | 141                           | 154                                    |
| <i>HPSE2</i>    | 9                              | 10                             | 10                            | 10                                     |
| <i>HTRA1</i>    | 64                             | 51                             | 59                            | 61                                     |
| <i>IGSF9B</i>   | 416                            | 411                            | 452                           | 497                                    |
| <i>IMMP2L</i>   | 145                            | 132                            | 143                           | 155                                    |
| <i>ITPK1</i>    | 26348                          | 24118                          | 24951                         | 24431                                  |
| <i>JAG1</i>     | 232                            | 252                            | 255                           | 301                                    |
| <i>KCNK5</i>    | 85                             | 81                             | 91                            | 86                                     |
| <i>LRP1</i>     | 16558                          | 14068                          | 15993                         | 15534                                  |
| <i>MED14</i>    | 3278                           | 3135                           | 3227                          | 3649                                   |
| <i>MEF2D</i>    | 12061                          | 11928                          | 12267                         | 12732                                  |
| <i>MPPED2</i>   | 92                             | 91                             | 99                            | 112                                    |
| <i>NCOA7</i>    | 1632                           | 1562                           | 1637                          | 1975                                   |
| <i>NLRP1</i>    | 59740                          | 57036                          | 57938                         | 62130                                  |
| <i>NOTCH4</i>   | 531                            | 456                            | 517                           | 523                                    |
| <i>NRP1</i>     | 375                            | 349                            | 394                           | 405                                    |
| <i>PHACTR1</i>  | 1845                           | 1978                           | 1702                          | 1877                                   |
| <i>PLCE1</i>    | 581                            | 588                            | 607                           | 725                                    |
| <i>PRDM16</i>   | 38                             | 38                             | 40                            | 44                                     |
| <i>REST</i>     | 3182                           | 3144                           | 3213                          | 3858                                   |
| <i>RNF213</i>   | 80118                          | 77507                          | 81327                         | 85673                                  |
| <i>SLC24A3</i>  | 176                            | 186                            | 170                           | 174                                    |
| <i>SPINK2</i>   | 30                             | 30                             | 30                            | 35                                     |
| <i>STAT6</i>    | 86242                          | 81865                          | 84292                         | 86766                                  |
| <i>TGFBR2</i>   | 26516                          | 26105                          | 26301                         | 30033                                  |
| <i>TRPM8</i>    | 100                            | 96                             | 97                            | 114                                    |
| <i>TSPAN2</i>   | 1938                           | 2027                           | 1984                          | 2466                                   |
| <i>UFL1</i>     | 1286                           | 1217                           | 1282                          | 1691                                   |
| <i>USP9X</i>    | 10365                          | 10203                          | 9859                          | 11268                                  |
| <i>WSCD1</i>    | 12                             | 11                             | 12                            | 12                                     |
| <i>YAP1</i>     | 18                             | 18                             | 16                            | 22                                     |
| <i>ZCCHC14</i>  | 1297                           | 1244                           | 1298                          | 1423                                   |

**Table S2.** Enriched migraine-specific GO-terms.

| <i>Network Cluster*</i> | <i>cluster</i> | <i>GOterm**</i> | <i>process</i>                                                          | <i>adjP***</i> |
|-------------------------|----------------|-----------------|-------------------------------------------------------------------------|----------------|
| A-0                     | 0              | GO:0000079      | regulation of cyclin-dependent protein serine/threonine kinase activity | 0.0148         |
| A-0                     | 0              | GO:0006323      | DNA packaging                                                           | 0.00988        |
| A-0                     | 0              | GO:0007018      | microtubule-based movement                                              | 0.0332         |
| A-0                     | 0              | GO:0007063      | regulation of sister chromatid cohesion                                 | 0.0177         |
| A-0                     | 0              | GO:0018105      | peptidyl-serine phosphorylation                                         | 0.0305         |
| A-0                     | 0              | GO:0030330      | DNA damage response, signal transduction by p53 class mediator          | 0.0474         |
| A-0                     | 0              | GO:0030890      | positive regulation of B cell proliferation                             | 0.0246         |
| A-0                     | 0              | GO:0031571      | mitotic G1 DNA damage checkpoint                                        | 0.0294         |
| A-0                     | 0              | GO:0032466      | negative regulation of cytokinesis                                      | 0.0294         |
| A-0                     | 0              | GO:0042770      | signal transduction in response to DNA damage                           | 0.0102         |
| A-0                     | 0              | GO:0044783      | G1 DNA damage checkpoint                                                | 0.0294         |
| A-0                     | 0              | GO:0044819      | mitotic G1/S transition checkpoint                                      | 0.0294         |
| A-0                     | 0              | GO:0045740      | positive regulation of DNA replication                                  | 0.00203        |
| A-0                     | 0              | GO:0048518      | positive regulation of biological process                               | 0.0102         |
| A-0                     | 0              | GO:0050871      | positive regulation of B cell activation                                | 0.0474         |
| A-0                     | 0              | GO:0051098      | regulation of binding                                                   | 0.0299         |
| A-0                     | 0              | GO:0051302      | regulation of cell division                                             | 0.0408         |
| A-0                     | 0              | GO:0051782      | negative regulation of cell division                                    | 0.0177         |
| A-0                     | 0              | GO:0071158      | positive regulation of cell cycle arrest                                | 0.0299         |
| A-0                     | 0              | GO:0071163      | DNA replication preinitiation complex assembly                          | 0.00458        |
| A-0                     | 0              | GO:0072413      | signal transduction involved in mitotic cell cycle checkpoint           | 0.0246         |
| A-0                     | 0              | GO:0072431      | signal transduction involved in mitotic G1 DNA damage checkpoint        | 0.0246         |
| A-0                     | 0              | GO:0090329      | regulation of DNA-dependent DNA replication                             | 0.0019         |
| A-0                     | 0              | GO:1902400      | intracellular signal transduction involved in G1 DNA damage checkpoint  | 0.0246         |
| A-0                     | 0              | GO:1902402      | signal transduction involved in mitotic DNA damage checkpoint           | 0.0246         |
| A-0                     | 0              | GO:1902403      | signal transduction involved in mitotic DNA integrity checkpoint        | 0.0246         |
| A-0                     | 0              | GO:1902806      | regulation of cell cycle G1/S phase transition                          | 0.0072         |
| A-0                     | 0              | GO:1904029      | regulation of cyclin-dependent protein kinase activity                  | 0.0224         |
| A-0                     | 0              | GO:1904668      | positive regulation of ubiquitin protein ligase activity                | 0.0294         |
| A-0                     | 0              | GO:2000045      | regulation of G1/S transition of mitotic cell cycle                     | 0.0135         |
| A-0                     | 0              | GO:2000105      | positive regulation of DNA-dependent DNA replication                    | 0.000309       |
| A-1                     | 1              | GO:0006266      | DNA ligation                                                            | 0.0146         |
| A-1                     | 1              | GO:0017148      | negative regulation of translation                                      | 0.0349         |
| A-1                     | 1              | GO:0031124      | mRNA 3'-end processing                                                  | 0.0146         |
| A-1                     | 1              | GO:0031392      | regulation of prostaglandin biosynthetic process                        | 0.0146         |

|     |   |            |                                                                  |         |
|-----|---|------------|------------------------------------------------------------------|---------|
| A-1 | 1 | GO:0032069 | regulation of nuclease activity                                  | 0.00411 |
| A-1 | 1 | GO:0035722 | interleukin-12-mediated signaling pathway                        | 0.0393  |
| A-1 | 1 | GO:0070671 | response to interleukin-12                                       | 0.0467  |
| A-1 | 1 | GO:0071349 | cellular response to interleukin-12                              | 0.0467  |
| A-1 | 1 | GO:0090305 | nucleic acid phosphodiester bond hydrolysis                      | 0.0118  |
| A-1 | 1 | GO:2001279 | regulation of unsaturated fatty acid biosynthetic process        | 0.0264  |
| A-2 | 2 | GO:0001819 | positive regulation of cytokine production                       | 0.0314  |
| A-2 | 2 | GO:0002281 | macrophage activation involved in immune response                | 0.0212  |
| A-2 | 2 | GO:0008625 | extrinsic apoptotic signaling pathway via death domain receptors | 0.00974 |
| A-2 | 2 | GO:0019370 | leukotriene biosynthetic process                                 | 0.0212  |
| A-2 | 2 | GO:0032102 | negative regulation of response to external stimulus             | 0.0123  |
| A-2 | 2 | GO:0032271 | regulation of protein polymerization                             | 0.0314  |
| A-2 | 2 | GO:0032479 | regulation of type I interferon production                       | 0.0189  |
| A-2 | 2 | GO:0032648 | regulation of interferon-beta production                         | 0.00642 |
| A-2 | 2 | GO:0032649 | regulation of interferon-gamma production                        | 0.0367  |
| A-2 | 2 | GO:0032652 | regulation of interleukin-1 production                           | 0.0426  |
| A-2 | 2 | GO:0032677 | regulation of interleukin-8 production                           | 0.0468  |
| A-2 | 2 | GO:0032688 | negative regulation of interferon-beta production                | 0.0212  |
| A-2 | 2 | GO:0070887 | cellular response to chemical stimulus                           | 0.0314  |
| A-2 | 2 | GO:0071345 | cellular response to cytokine stimulus                           | 0.0204  |
| A-3 | 3 | GO:0000186 | activation of MAPKK activity                                     | 0.0399  |
| A-3 | 3 | GO:0002224 | toll-like receptor signaling pathway                             | 0.0177  |
| A-3 | 3 | GO:0002755 | MyD88-dependent toll-like receptor signaling pathway             | 0.0114  |
| A-3 | 3 | GO:0007049 | cell cycle                                                       | 0.0149  |
| A-3 | 3 | GO:0007249 | I-kappaB kinase/NF-kappaB signaling                              | 0.0341  |
| A-3 | 3 | GO:0007257 | activation of JUN kinase activity                                | 0.0436  |
| A-3 | 3 | GO:0009892 | negative regulation of metabolic process                         | 0.0443  |
| A-3 | 3 | GO:0009893 | positive regulation of metabolic process                         | 0.0377  |
| A-3 | 3 | GO:0009896 | positive regulation of catabolic process                         | 0.0393  |
| A-3 | 3 | GO:0010556 | regulation of macromolecule biosynthetic process                 | 0.0207  |
| A-3 | 3 | GO:0010604 | positive regulation of macromolecule metabolic process           | 0.0144  |
| A-3 | 3 | GO:0016579 | protein deubiquitination                                         | 0.0406  |
| A-3 | 3 | GO:0019222 | regulation of metabolic process                                  | 0.0335  |
| A-3 | 3 | GO:0030334 | regulation of cell migration                                     | 0.0389  |
| A-3 | 3 | GO:0031058 | positive regulation of histone modification                      | 0.0304  |
| A-3 | 3 | GO:0031063 | regulation of histone deacetylation                              | 0.021   |
| A-3 | 3 | GO:0031065 | positive regulation of histone deacetylation                     | 0.0145  |
| A-3 | 3 | GO:0031323 | regulation of cellular metabolic process                         | 0.00704 |
| A-3 | 3 | GO:0031324 | negative regulation of cellular metabolic process                | 0.0335  |
| A-3 | 3 | GO:0031325 | positive regulation of cellular metabolic process                | 0.0287  |
| A-3 | 3 | GO:0031326 | regulation of cellular biosynthetic process                      | 0.0177  |
| A-3 | 3 | GO:0031399 | regulation of protein modification process                       | 0.0287  |

|      |    |            |                                                                                               |         |
|------|----|------------|-----------------------------------------------------------------------------------------------|---------|
| A-3  | 3  | GO:0031401 | positive regulation of protein modification process                                           | 0.0393  |
| A-3  | 3  | GO:0032268 | regulation of cellular protein metabolic process                                              | 0.0281  |
| A-3  | 3  | GO:0033554 | cellular response to stress                                                                   | 0.0399  |
| A-3  | 3  | GO:0035556 | intracellular signal transduction                                                             | 0.0389  |
| A-3  | 3  | GO:0038089 | positive regulation of cell migration by vascular endothelial growth factor signaling pathway | 0.0393  |
| A-3  | 3  | GO:0042176 | regulation of protein catabolic process                                                       | 0.0324  |
| A-3  | 3  | GO:0044264 | cellular polysaccharide metabolic process                                                     | 0.0399  |
| A-3  | 3  | GO:0045732 | positive regulation of protein catabolic process                                              | 0.0346  |
| A-3  | 3  | GO:0048523 | negative regulation of cellular process                                                       | 0.0315  |
| A-3  | 3  | GO:0051128 | regulation of cellular component organization                                                 | 0.021   |
| A-3  | 3  | GO:0051171 | regulation of nitrogen compound metabolic process                                             | 0.0065  |
| A-3  | 3  | GO:0051173 | positive regulation of nitrogen compound metabolic process                                    | 0.0177  |
| A-3  | 3  | GO:0051270 | regulation of cellular component movement                                                     | 0.0242  |
| A-3  | 3  | GO:0051338 | regulation of transferase activity                                                            | 0.0287  |
| A-3  | 3  | GO:0060255 | regulation of macromolecule metabolic process                                                 | 0.0106  |
| A-3  | 3  | GO:0061136 | regulation of proteasomal protein catabolic process                                           | 0.00915 |
| A-3  | 3  | GO:0080135 | regulation of cellular response to stress                                                     | 0.021   |
| A-3  | 3  | GO:0090045 | positive regulation of deacetylase activity                                                   | 0.0242  |
| A-3  | 3  | GO:0090312 | positive regulation of protein deacetylation                                                  | 0.021   |
| A-3  | 3  | GO:0150065 | regulation of deacetylase activity                                                            | 0.0242  |
| A-3  | 3  | GO:1901673 | regulation of mitotic spindle assembly                                                        | 0.0348  |
| A-3  | 3  | GO:1901699 | cellular response to nitrogen compound                                                        | 0.0315  |
| A-3  | 3  | GO:1901725 | regulation of histone deacetylase activity                                                    | 0.0242  |
| A-3  | 3  | GO:1901727 | positive regulation of histone deacetylase activity                                           | 0.0242  |
| A-3  | 3  | GO:1901800 | positive regulation of proteasomal protein catabolic process                                  | 0.0335  |
| A-3  | 3  | GO:1903362 | regulation of cellular protein catabolic process                                              | 0.0389  |
| A-3  | 3  | GO:2000112 | regulation of cellular macromolecule biosynthetic process                                     | 0.0287  |
| A-3  | 3  | GO:2000145 | regulation of cell motility                                                                   | 0.0214  |
| A-4  | 4  | GO:0070527 | platelet aggregation                                                                          | 0.043   |
| A-9  | 9  | GO:0003002 | regionalization                                                                               | 0.0359  |
| A-9  | 9  | GO:0003008 | system process                                                                                | 0.0233  |
| A-9  | 9  | GO:0021513 | spinal cord dorsal/ventral patterning                                                         | 0.0374  |
| A-9  | 9  | GO:0030325 | adrenal gland development                                                                     | 0.0339  |
| A-9  | 9  | GO:0050877 | nervous system process                                                                        | 0.0145  |
| A-9  | 9  | GO:0050906 | detection of stimulus involved in sensory perception                                          | 0.033   |
| A-10 | 10 | GO:0006511 | ubiquitin-dependent protein catabolic process                                                 | 0.0405  |
| A-10 | 10 | GO:0019941 | modification-dependent protein catabolic process                                              | 0.0432  |
| A-10 | 10 | GO:0043161 | proteasome-mediated ubiquitin-dependent protein catabolic process                             | 0.016   |
| A-10 | 10 | GO:0043412 | macromolecule modification                                                                    | 0.0298  |
| A-10 | 10 | GO:0043632 | modification-dependent macromolecule catabolic process                                        | 0.0462  |

|      |    |            |                                                            |         |
|------|----|------------|------------------------------------------------------------|---------|
| A-10 | 10 | GO:0051603 | proteolysis involved in cellular protein catabolic process | 0.0392  |
| A-12 | 12 | GO:0001932 | regulation of protein phosphorylation                      | 0.0444  |
| A-12 | 12 | GO:0002698 | negative regulation of immune effector process             | 0.0186  |
| A-12 | 12 | GO:0002920 | regulation of humoral immune response                      | 0.0354  |
| A-12 | 12 | GO:0003013 | circulatory system process                                 | 0.0302  |
| A-12 | 12 | GO:0007154 | cell communication                                         | 0.0243  |
| A-12 | 12 | GO:0007165 | signal transduction                                        | 0.0369  |
| A-12 | 12 | GO:0007166 | cell surface receptor signaling pathway                    | 0.00329 |
| A-12 | 12 | GO:0008015 | blood circulation                                          | 0.0254  |
| A-12 | 12 | GO:0009967 | positive regulation of signal transduction                 | 0.0186  |
| A-12 | 12 | GO:0023052 | signaling                                                  | 0.0398  |
| A-12 | 12 | GO:0031348 | negative regulation of defense response                    | 0.00161 |
| A-12 | 12 | GO:0033993 | response to lipid                                          | 0.0428  |
| A-12 | 12 | GO:0034367 | protein-containing complex remodeling                      | 0.00412 |
| A-12 | 12 | GO:0034368 | protein-lipid complex remodeling                           | 0.00412 |
| A-12 | 12 | GO:0034369 | plasma lipoprotein particle remodeling                     | 0.00412 |
| A-12 | 12 | GO:0034370 | triglyceride-rich lipoprotein particle remodeling          | 0.00959 |
| A-12 | 12 | GO:0034372 | very-low-density lipoprotein particle remodeling           | 0.00419 |
| A-12 | 12 | GO:0045926 | negative regulation of growth                              | 0.0159  |
| A-12 | 12 | GO:0050790 | regulation of catalytic activity                           | 0.0385  |
| A-12 | 12 | GO:0050900 | leukocyte migration                                        | 0.0263  |
| A-12 | 12 | GO:0051239 | regulation of multicellular organismal process             | 0.0475  |
| A-12 | 12 | GO:0051241 | negative regulation of multicellular organismal process    | 0.00863 |
| A-12 | 12 | GO:0051336 | regulation of hydrolase activity                           | 0.0126  |
| A-12 | 12 | GO:0051716 | cellular response to stimulus                              | 0.0339  |
| A-12 | 12 | GO:0071825 | protein-lipid complex subunit organization                 | 0.0143  |
| A-12 | 12 | GO:0071827 | plasma lipoprotein particle organization                   | 0.0119  |
| A-13 | 13 | GO:0006811 | ion transport                                              | 0.00506 |
| A-13 | 13 | GO:0006812 | cation transport                                           | 0.00394 |
| A-13 | 13 | GO:0034220 | ion transmembrane transport                                | 0.00183 |
| A-13 | 13 | GO:0098655 | cation transmembrane transport                             | 0.0237  |
| A-13 | 13 | GO:0098660 | inorganic ion transmembrane transport                      | 0.00853 |
| A-14 | 14 | GO:0002475 | antigen processing and presentation via MHC class Ib       | 0.0364  |
| A-14 | 14 | GO:0006783 | heme biosynthetic process                                  | 0.0301  |
| A-14 | 14 | GO:0010506 | regulation of autophagy                                    | 0.036   |
| A-14 | 14 | GO:0019724 | B cell mediated immunity                                   | 0.0418  |
| A-14 | 14 | GO:0030097 | hemopoiesis                                                | 0.0205  |
| A-14 | 14 | GO:0042592 | homeostatic process                                        | 0.0192  |
| A-14 | 14 | GO:0048518 | positive regulation of biological process                  | 0.0299  |
| A-14 | 14 | GO:0048534 | hematopoietic or lymphoid organ development                | 0.036   |
| A-14 | 14 | GO:0048878 | chemical homeostasis                                       | 0.036   |
| A-14 | 14 | GO:0050896 | response to stimulus                                       | 0.016   |
| A-16 | 16 | GO:0010035 | response to inorganic substance                            | 0.0304  |
| A-16 | 16 | GO:0010038 | response to metal ion                                      | 0.0497  |

|      |    |            |                                                                           |         |
|------|----|------------|---------------------------------------------------------------------------|---------|
| A-16 | 16 | GO:0051249 | regulation of lymphocyte activation                                       | 0.049   |
| A-17 | 17 | GO:0001655 | urogenital system development                                             | 0.0431  |
| A-17 | 17 | GO:0072001 | renal system development                                                  | 0.045   |
| A-19 | 19 | GO:0006464 | cellular protein modification process                                     | 0.0435  |
| A-19 | 19 | GO:0006879 | cellular iron ion homeostasis                                             | 0.0286  |
| A-19 | 19 | GO:0036211 | protein modification process                                              | 0.0435  |
| A-19 | 19 | GO:0045638 | negative regulation of myeloid cell differentiation                       | 0.0344  |
| B-0  | 0  | GO:0033260 | nuclear DNA replication                                                   | 0.0105  |
| B-0  | 0  | GO:0035088 | establishment or maintenance of apical/basal cell polarity                | 0.0474  |
| B-0  | 0  | GO:0042074 | cell migration involved in gastrulation                                   | 0.0105  |
| B-0  | 0  | GO:0044786 | cell cycle DNA replication                                                | 0.0105  |
| B-0  | 0  | GO:0051307 | meiotic chromosome separation                                             | 0.0172  |
| B-0  | 0  | GO:0061245 | establishment or maintenance of bipolar cell polarity                     | 0.0474  |
| B-1  | 1  | GO:0000209 | protein polyubiquitination                                                | 0.00132 |
| B-1  | 1  | GO:0002220 | innate immune response activating cell surface receptor signaling pathway | 0.03    |
| B-1  | 1  | GO:0002283 | neutrophil activation involved in immune response                         | 0.0491  |
| B-1  | 1  | GO:0002478 | antigen processing and presentation of exogenous peptide antigen          | 0.0218  |
| B-1  | 1  | GO:0006511 | ubiquitin-dependent protein catabolic process                             | 0.0292  |
| B-1  | 1  | GO:0010498 | proteasomal protein catabolic process                                     | 0.024   |
| B-1  | 1  | GO:0019884 | antigen processing and presentation of exogenous antigen                  | 0.03    |
| B-1  | 1  | GO:0019941 | modification-dependent protein catabolic process                          | 0.0301  |
| B-1  | 1  | GO:0033209 | tumor necrosis factor-mediated signaling pathway                          | 0.0216  |
| B-1  | 1  | GO:0035567 | non-canonical Wnt signaling pathway                                       | 0.0485  |
| B-1  | 1  | GO:0043161 | proteasome-mediated ubiquitin-dependent protein catabolic process         | 0.0127  |
| B-1  | 1  | GO:0043312 | neutrophil degranulation                                                  | 0.047   |
| B-1  | 1  | GO:0043632 | modification-dependent macromolecule catabolic process                    | 0.0319  |
| B-1  | 1  | GO:0048002 | antigen processing and presentation of peptide antigen                    | 0.0347  |
| B-1  | 1  | GO:0051603 | proteolysis involved in cellular protein catabolic process                | 0.0395  |
| B-1  | 1  | GO:0051973 | positive regulation of telomerase activity                                | 0.0485  |
| B-1  | 1  | GO:0071824 | protein-DNA complex subunit organization                                  | 0.0485  |
| B-1  | 1  | GO:0090090 | negative regulation of canonical Wnt signaling pathway                    | 0.0496  |
| B-1  | 1  | GO:1901987 | regulation of cell cycle phase transition                                 | 0.0142  |
| B-1  | 1  | GO:1901990 | regulation of mitotic cell cycle phase transition                         | 0.0445  |
| B-1  | 1  | GO:2000736 | regulation of stem cell differentiation                                   | 0.0202  |
| B-2  | 2  | GO:0006333 | chromatin assembly or disassembly                                         | 0.0157  |
| B-2  | 2  | GO:0006334 | nucleosome assembly                                                       | 0.0168  |
| B-2  | 2  | GO:0009611 | response to wounding                                                      | 0.00663 |
| B-2  | 2  | GO:0030041 | actin filament polymerization                                             | 0.0344  |
| B-2  | 2  | GO:0031497 | chromatin assembly                                                        | 0.0318  |



|             |    |            |                                                                  |         |
|-------------|----|------------|------------------------------------------------------------------|---------|
| <i>B-2</i>  | 2  | GO:0034728 | nucleosome organization                                          | 0.0168  |
| <i>B-2</i>  | 2  | GO:0043313 | regulation of neutrophil degranulation                           | 0.0169  |
| <i>B-2</i>  | 2  | GO:0043933 | protein-containing complex subunit organization                  | 0.00292 |
| <i>B-2</i>  | 2  | GO:0051345 | positive regulation of hydrolase activity                        | 0.0327  |
| <i>B-2</i>  | 2  | GO:0051651 | maintenance of location in cell                                  | 0.0225  |
| <i>B-2</i>  | 2  | GO:0065003 | protein-containing complex assembly                              | 0.00503 |
| <i>B-2</i>  | 2  | GO:0065004 | protein-DNA complex assembly                                     | 0.0268  |
| <i>B-2</i>  | 2  | GO:0071824 | protein-DNA complex subunit organization                         | 0.0269  |
| <i>B-2</i>  | 2  | GO:0090200 | positive regulation of release of cytochrome c from mitochondria | 0.0277  |
| <i>B-2</i>  | 2  | GO:0097435 | supramolecular fiber organization                                | 0.0426  |
| <i>B-2</i>  | 2  | GO:2001235 | positive regulation of apoptotic signaling pathway               | 0.0344  |
| <i>B-2</i>  | 2  | GO:2001242 | regulation of intrinsic apoptotic signaling pathway              | 0.0104  |
| <i>B-2</i>  | 2  | GO:2001243 | negative regulation of intrinsic apoptotic signaling pathway     | 0.0426  |
| <i>B-3</i>  | 3  | GO:0006643 | membrane lipid metabolic process                                 | 0.0336  |
| <i>B-3</i>  | 3  | GO:0008610 | lipid biosynthetic process                                       | 0.0423  |
| <i>B-4</i>  | 4  | GO:0006950 | response to stress                                               | 0.00445 |
| <i>B-9</i>  | 9  | GO:0001708 | cell fate specification                                          | 0.0313  |
| <i>B-9</i>  | 9  | GO:0003156 | regulation of animal organ formation                             | 0.0356  |
| <i>B-9</i>  | 9  | GO:0009653 | anatomical structure morphogenesis                               | 0.0444  |
| <i>B-9</i>  | 9  | GO:0009887 | animal organ morphogenesis                                       | 0.0464  |
| <i>B-9</i>  | 9  | GO:0021536 | diencephalon development                                         | 0.029   |
| <i>B-9</i>  | 9  | GO:0022612 | gland morphogenesis                                              | 0.014   |
| <i>B-9</i>  | 9  | GO:0030154 | cell differentiation                                             | 0.04    |
| <i>B-9</i>  | 9  | GO:0030539 | male genitalia development                                       | 0.029   |
| <i>B-9</i>  | 9  | GO:0030850 | prostate gland development                                       | 0.0464  |
| <i>B-9</i>  | 9  | GO:0048468 | cell development                                                 | 0.0256  |
| <i>B-9</i>  | 9  | GO:0048598 | embryonic morphogenesis                                          | 0.0356  |
| <i>B-9</i>  | 9  | GO:0048646 | anatomical structure formation involved in morphogenesis         | 0.0464  |
| <i>B-9</i>  | 9  | GO:0048665 | neuron fate specification                                        | 0.014   |
| <i>B-9</i>  | 9  | GO:0048732 | gland development                                                | 0.0225  |
| <i>B-9</i>  | 9  | GO:0048736 | appendage development                                            | 0.0444  |
| <i>B-9</i>  | 9  | GO:0048806 | genitalia development                                            | 0.0178  |
| <i>B-9</i>  | 9  | GO:0048863 | stem cell differentiation                                        | 0.0356  |
| <i>B-9</i>  | 9  | GO:0048869 | cellular developmental process                                   | 0.0444  |
| <i>B-9</i>  | 9  | GO:0060173 | limb development                                                 | 0.0444  |
| <i>B-9</i>  | 9  | GO:0060571 | morphogenesis of an epithelial fold                              | 0.0319  |
| <i>B-9</i>  | 9  | GO:2000036 | regulation of stem cell population maintenance                   | 0.0356  |
| <i>B-10</i> | 10 | GO:0036092 | phosphatidylinositol-3-phosphate biosynthetic process            | 0.021   |
| <i>B-11</i> | 11 | GO:0070098 | chemokine-mediated signaling pathway                             | 0.0306  |
| <i>B-11</i> | 11 | GO:0140131 | positive regulation of lymphocyte chemotaxis                     | 0.0143  |
| <i>B-11</i> | 11 | GO:1990868 | response to chemokine                                            | 0.0399  |
| <i>B-11</i> | 11 | GO:1990869 | cellular response to chemokine                                   | 0.0399  |

|             |    |            |                                                                                                 |         |
|-------------|----|------------|-------------------------------------------------------------------------------------------------|---------|
| <i>B-11</i> | 11 | GO:2000503 | positive regulation of natural killer cell chemotaxis                                           | 0.00757 |
| <i>B-12</i> | 12 | GO:0022617 | extracellular matrix disassembly                                                                | 0.0412  |
| <i>B-12</i> | 12 | GO:0061025 | membrane fusion                                                                                 | 0.00803 |
| <i>B-13</i> | 13 | GO:0001508 | action potential                                                                                | 0.0124  |
| <i>B-13</i> | 13 | GO:0009698 | phenylpropanoid metabolic process                                                               | 0.0153  |
| <i>B-13</i> | 13 | GO:0009804 | coumarin metabolic process                                                                      | 0.0153  |
| <i>B-14</i> | 14 | GO:0002479 | antigen processing and presentation of exogenous peptide antigen via MHC class I, TAP-dependent | 0.0304  |
| <i>B-14</i> | 14 | GO:0006897 | endocytosis                                                                                     | 0.0357  |
| <i>B-14</i> | 14 | GO:0034383 | low-density lipoprotein particle clearance                                                      | 0.00807 |
| <i>B-14</i> | 14 | GO:0043277 | apoptotic cell clearance                                                                        | 0.0485  |
| <i>B-14</i> | 14 | GO:1901685 | glutathione derivative metabolic process                                                        | 0.0493  |
| <i>B-14</i> | 14 | GO:1901687 | glutathione derivative biosynthetic process                                                     | 0.0493  |
| <i>B-16</i> | 16 | GO:0097428 | protein maturation by iron-sulfur cluster transfer                                              | 0.00624 |
| <i>B-16</i> | 16 | GO:1903578 | regulation of ATP metabolic process                                                             | 0.0371  |
| <i>B-17</i> | 17 | GO:0019752 | carboxylic acid metabolic process                                                               | 0.0323  |
| <i>B-17</i> | 17 | GO:0042537 | benzene-containing compound metabolic process                                                   | 0.00297 |
| <i>B-17</i> | 17 | GO:0048519 | negative regulation of biological process                                                       | 0.0462  |
| <i>B-17</i> | 17 | GO:0072676 | lymphocyte migration                                                                            | 0.0384  |
| <i>B-19</i> | 19 | GO:0002221 | pattern recognition receptor signaling pathway                                                  | 0.00767 |
| <i>B-19</i> | 19 | GO:0002755 | MyD88-dependent toll-like receptor signaling pathway                                            | 0.0421  |
| <i>B-19</i> | 19 | GO:0006954 | inflammatory response                                                                           | 0.0232  |
| <i>B-19</i> | 19 | GO:0007249 | I-kappaB kinase/NF-kappaB signaling                                                             | 0.0439  |
| <i>B-19</i> | 19 | GO:0009617 | response to bacterium                                                                           | 0.0343  |
| <i>B-19</i> | 19 | GO:0016458 | gene silencing                                                                                  | 0.0439  |
| <i>B-19</i> | 19 | GO:0032728 | positive regulation of interferon-beta production                                               | 0.0419  |
| <i>B-19</i> | 19 | GO:1901222 | regulation of NIK/NF-kappaB signaling                                                           | 0.0368  |
| <i>B-19</i> | 19 | GO:1904645 | response to amyloid-beta                                                                        | 0.0421  |
| <i>B-19</i> | 19 | GO:1904646 | cellular response to amyloid-beta                                                               | 0.0214  |

\*Clusters are marked with A and B, representing the networks ‘during migraine attack’ (A) and ‘after treatment’ (B).

\*\*GOterm = Gene Ontology term

\*\*\*P<sub>adj</sub> = P-value adjusted for multiple-testing
